# Supplementary material
Source: PubMed Central journal article supplement (PMC7415618)
Supplement: NIHMS1598004-supplement-1.pdf [file NIHMS1598004-supplement-1.pdf]

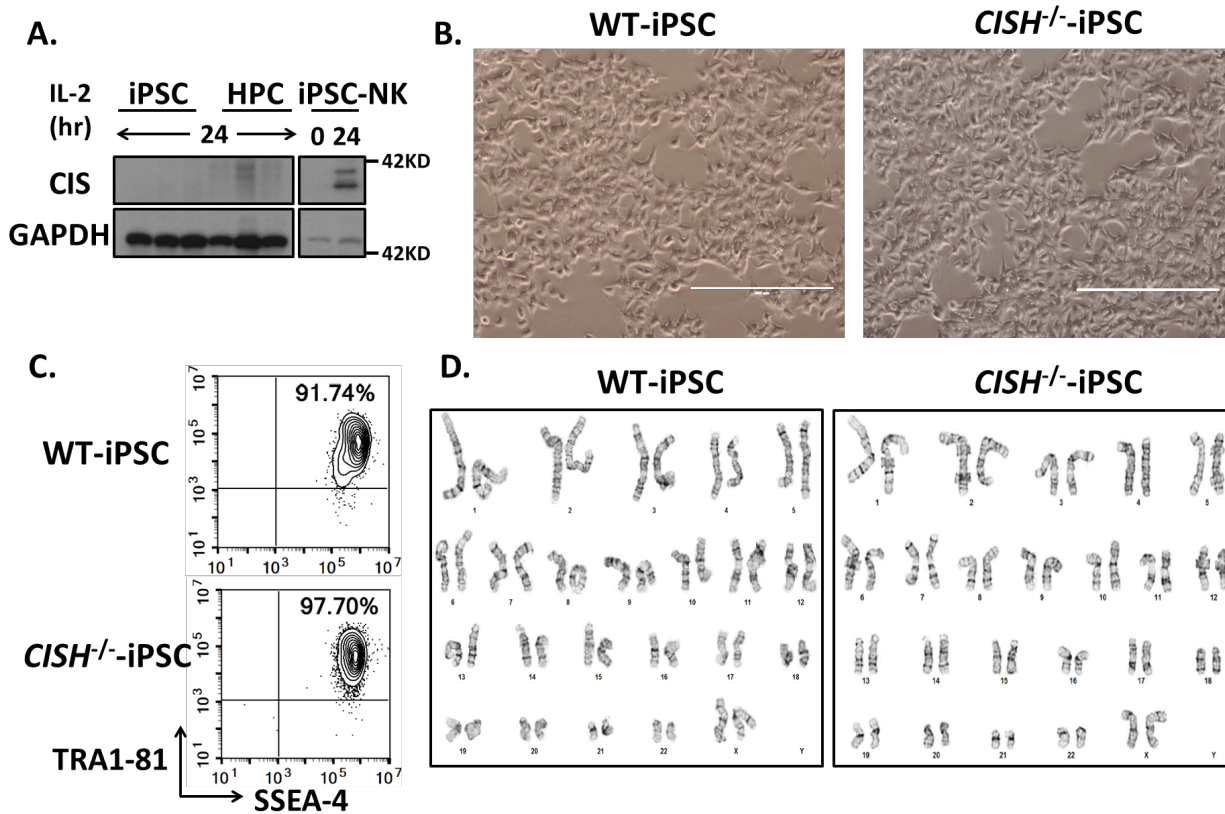

**Supplemental Figure S1. Related to Figure 1. Characterization of *CISH*<sup>-/-</sup> iPSC.** **A.** Immunoblot of CIS expression in iPSCs and hematopoietic progenitor cells (HPC). Undifferentiated iPSCs and day 6 embryoid bodies (EB) were treated with IL-2 (100 U/ml) for 24 hours. The whole day 6 EB (90% CD34<sup>+</sup> cells) contain HPCs. As expected, these undifferentiated iPSCs and HPCs do not express CIS. iPSC-NK cells treated with IL-2(100 U/ml) for 0 and 24 hours were used as negative and positive controls. GAPDH was used as loading control. **B.** Phase microscope images of WT-iPSC and *CISH*<sup>-/-</sup> iPSC cells. Scale bar: 400 μM. **C.** Staining of pluripotency markers TRA1-81 and SSEA-4 by flow cytometry. **D.** Karyotype of WT-iPSC and *CISH*<sup>-/-</sup> iPSC.

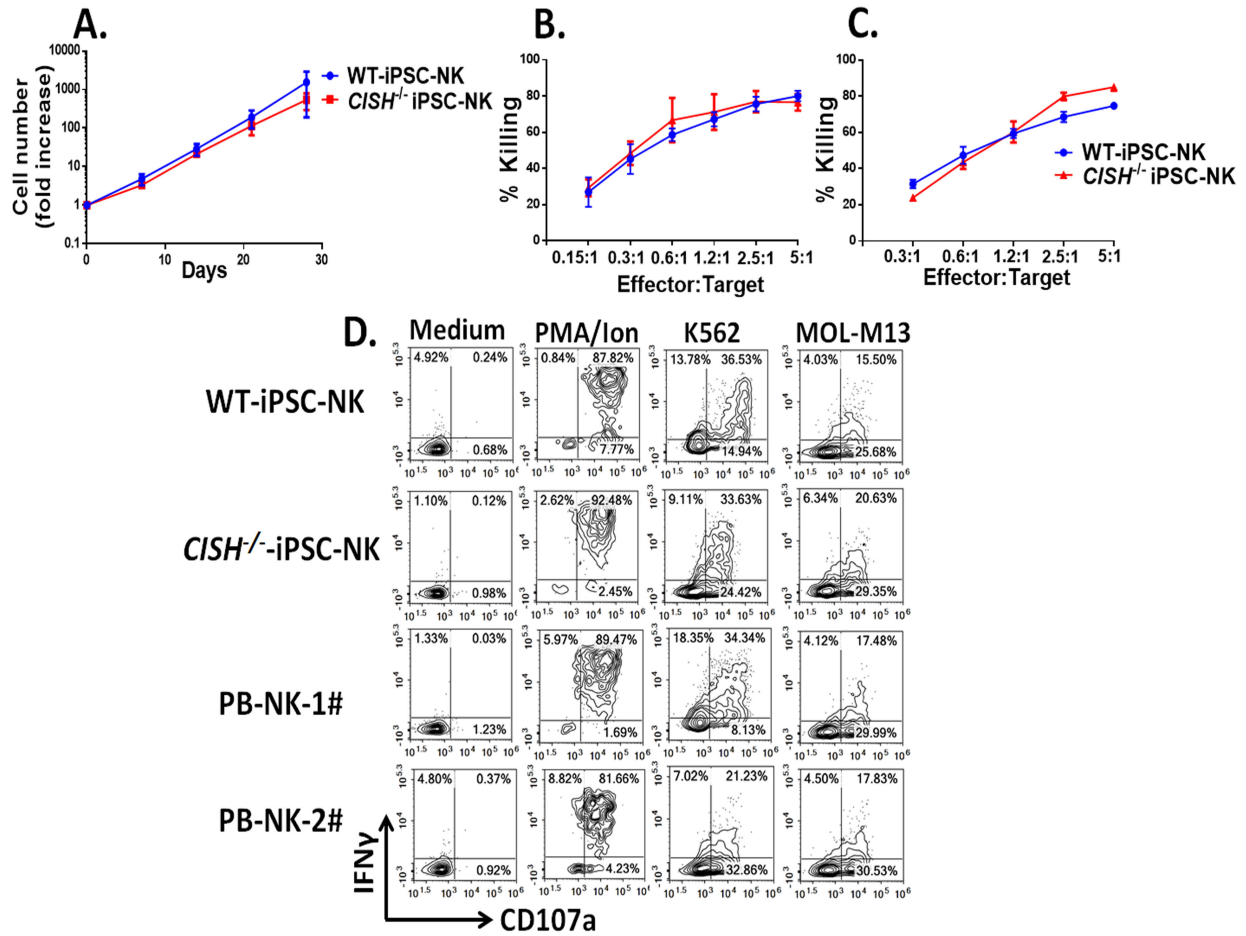

**Supplemental Figure S2. Related to Figure 3.** *CISH*<sup>-/-</sup> iPSC-NK cells and WT-iPSC-NK cells show similar expansion and killing activity when maintained with aAPC plus high cytokine concentration. **A.** *CISH*<sup>-/-</sup> iPSC-NK cells and WT-iPSC-NK cells were expanded with aAPC plus IL-2 (100 U/ml) as previously reported. Cell growth was counted weekly. **B-C.** After 3 weeks' expansion with aAPC plus IL-2, killing against K562 (**B**) and MOLM-13 (**C**) cells were evaluated using CellEvent™ Caspase-3/7 Green Flow Cytometry Assay after 4 hours' co-incubation of NK cells and target cells. **D.** WT-iPSC-NK cells, *CISH*<sup>-/-</sup> iPSC-NK-cells and PB-NK cells from 2 donors (PB-NK-1# and PB-NK-2#) were expanded with aAPC plus IL-2. After expansion, cells were left unstimulated or stimulated with a 1:1 ratio of target cells and stained for CD107a and IFN $\gamma$  4 hours later. Data at A-C were shown as mean  $\pm$  SD. Data at A-D were repeated in 3 separate experiments.

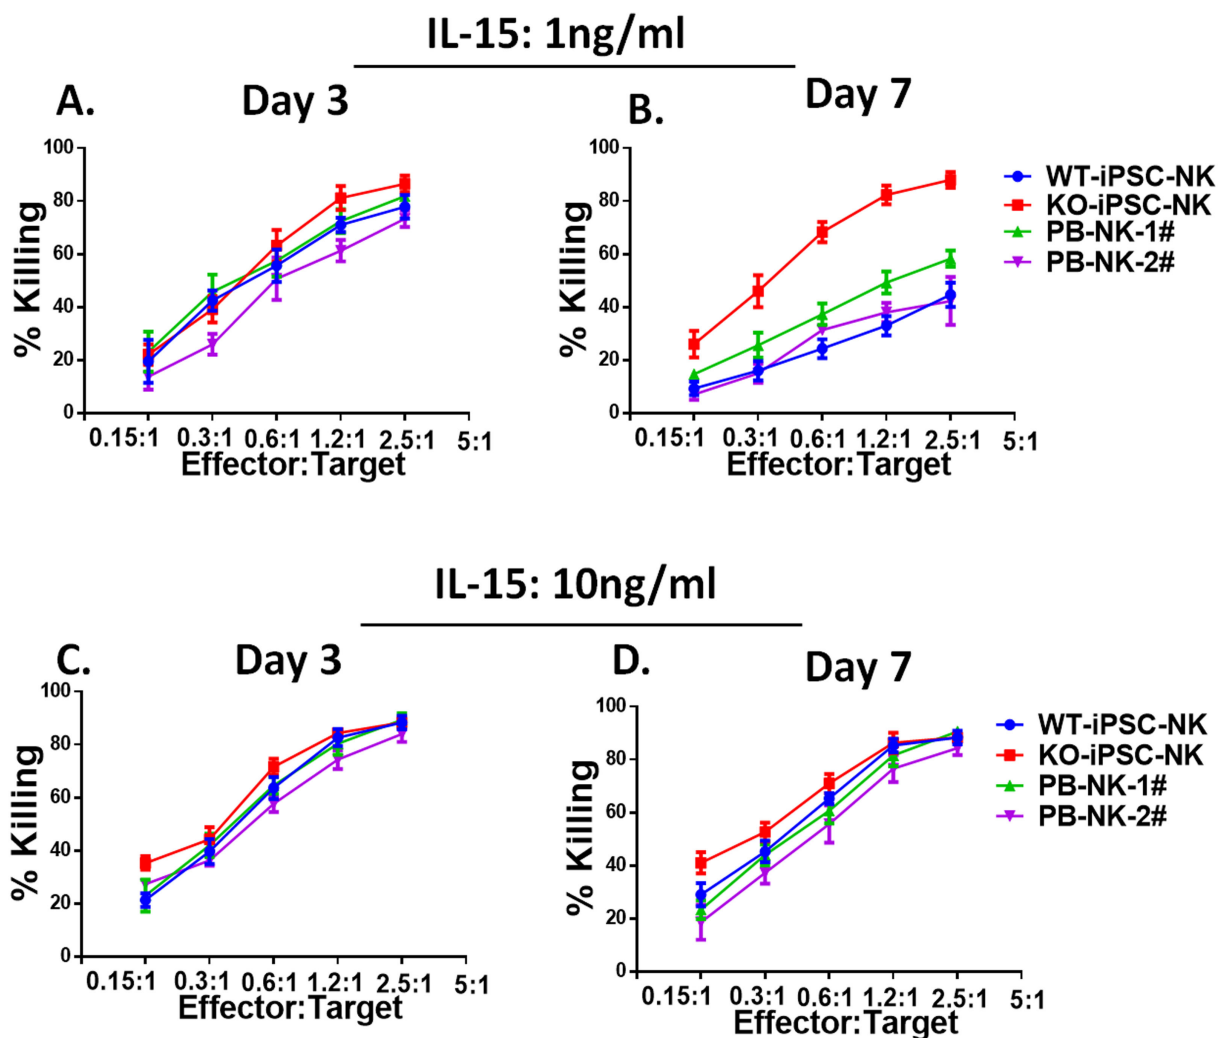

**Supplemental Figure S3. Related to Figure 3. *CISH*<sup>-/-</sup> iPSC-NK cells show better killing activity when maintained with low concentration of IL-15 in comparison with WT-iPSC-NK or PB-NK cells A-D.** WT-iPSC-NK cells, *CISH*<sup>-/-</sup> iPSC-NK-cells and PB-NK cells from 2 donors (PB-NK-1# and PB-NK-2#) were incubated with 1 ng/ml IL-15 (A, B) or 10 ng/ml IL-15 (C, D) for 3 days (A, C) or 7 days (B, D). Then killing against K562 were evaluated using CellEvent™ Caspase-3/7 Green Flow Cytometry Assay after 4 hours' co-incubation of NK cells and target cells (n=3). Data were shown as mean ± SD. Data and were repeated in 2 separate experiments.

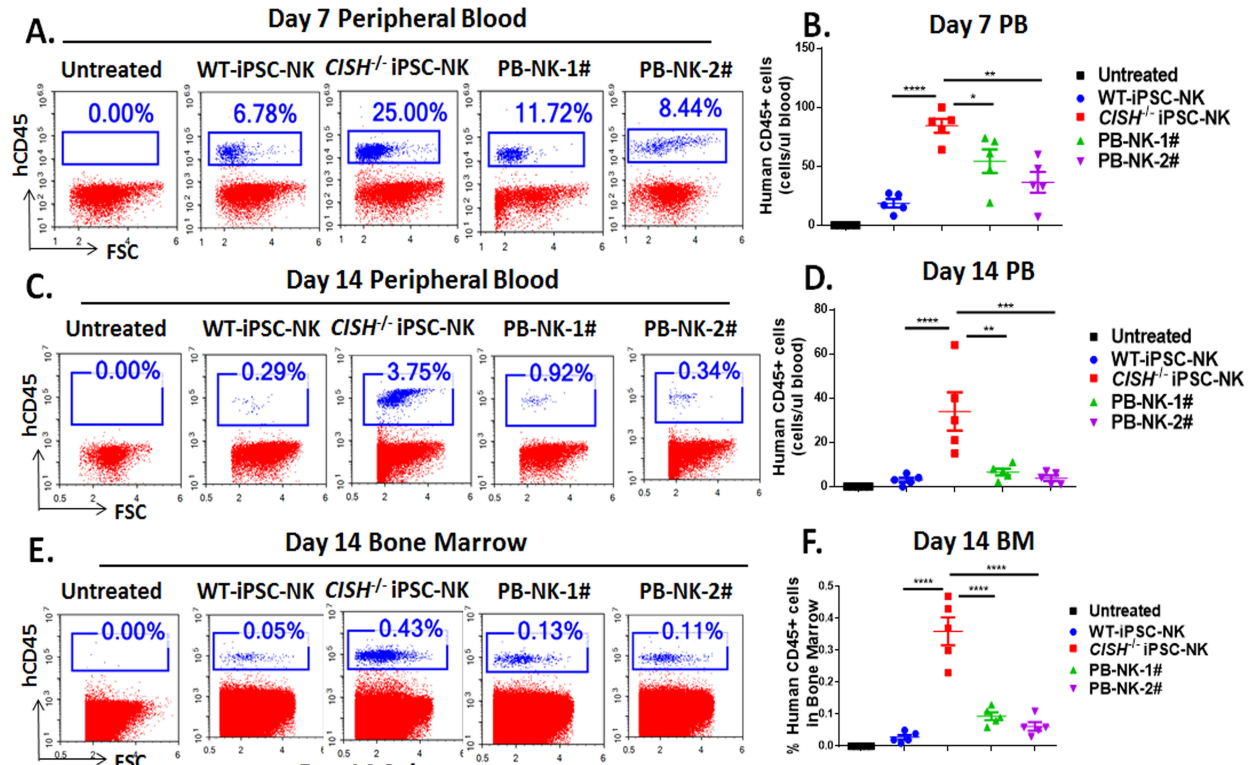

**Supplemental Figure S4. Related to Figure 4. *CISH*<sup>-/-</sup> iPSC-NK cells have better in vivo persistence and bone marrow homing compared with WT-iPSC-NK and PB-NK cells.** NSG mice were untreated or dosed with one iv injection of  $10^7$  WT-iPSC-NK cells or *CISH*<sup>-/-</sup> iPSC-NK cells or PB-NK-1# or PB-NK-2# cells. NK cells were supported by every other day injections of IL-2. **A.** Representative flow cytometric plot of human CD45<sup>+</sup> cells in population from peripheral blood (PB) at day 7. **B.** Quantification of human CD45<sup>+</sup> cells in PB. **C, E:** Representative flow cytometric plot of human CD45<sup>+</sup> cells in population from PB (C) and Bone Marrow (BM) (E) at day 14. **D, F:** Quantification of human CD45<sup>+</sup> cells in PB (D) and BM (F). Each dot represents one recipient mouse (n=5). Median  $\pm$  SD is shown. Statistics: One way ANOVA, \*P<0.05, \*\*P<0.01, \*\*\*P<0.001, \*\*\*\*P<0.0001.

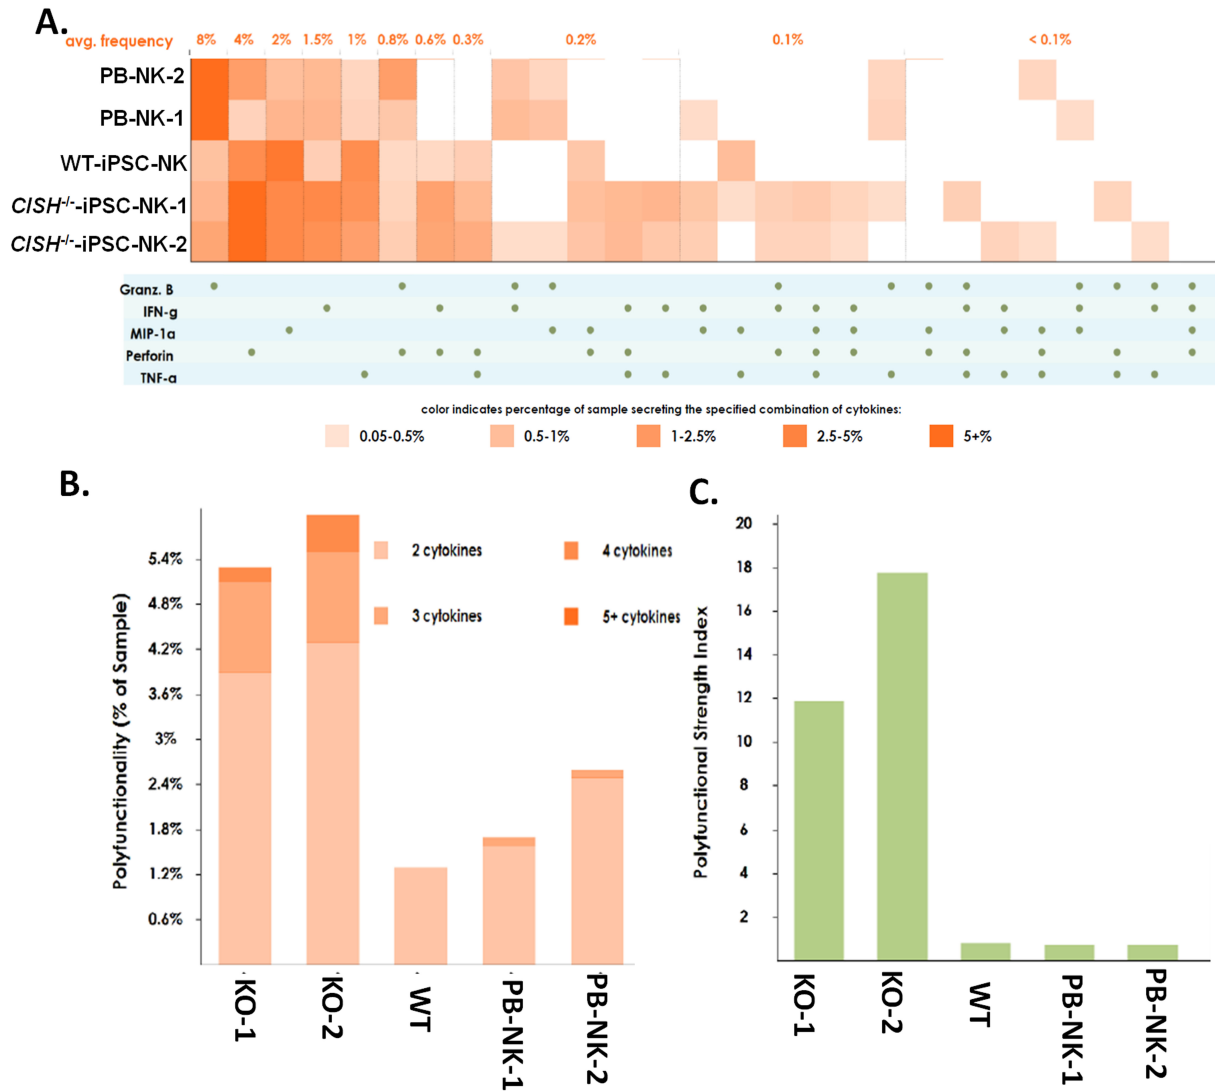

**Supplemental Figure S5. Related to Figure 5. *CISH*<sup>-/-</sup> iPSC-NK cells show improved single-cell polyfunctionality** **A.** *CISH*<sup>-/-</sup> iPSC-NK cells and WT iPSC-NK cells were incubated with a low concentration of IL-15 (1 ng/ml) overnight and then stimulated with IL-12 (10 ng/ml) and IL-18 (100 ng/ml). Cytokine production at the single cell level was measured and analyzed using the Isoplex 32-plex, immune cytokine response panel. 5 effector cytokines (Granzyme B, IFN $\gamma$ , MIP-1 $\alpha$ , Perforin, TNF $\alpha$ ) involved in cytotoxic function were shown. **B.** Quantification of percentage of cell population with polyfunctionality (secret >2 cytokines). **C.** Polyfunctionality was measured through a PSI, spanning a pre-specified panel of 32 key immunologically relevant molecules across major categories: homeostatic/proliferative, inflammatory, chemotactic, regulatory, and immune effector. PSI, polyfunctionality strength index.

**Supplemental Table 1. List of antibodies used for mass cytometry panel. Related to STAR method**

| <b>Tag</b> | <b>Marker</b> | <b>Clone</b> | <b>Isotype</b>     | <b>Vendor</b> | <b>Catalog number</b> |
|------------|---------------|--------------|--------------------|---------------|-----------------------|
| 89Y        | CD45          | HI30         | IgG1               | Fluidigm      | 3089003B              |
| Qdot655    | CD19          | SJ25-C1      | Mouse IgG1 kappa   | Invitrogen    | Q10179                |
| 141Pr      | KIR2DS4       | JJC11.6      | Mouse IgG1 kappa   | Miltenyi      | 130-092-679           |
| 142Nd      | CD57          | HCD57        | Other              | Fluidigm      | 3142007B              |
| 143Nd      | 2B4           | REA112       | Recomb. human IgG1 | Miltenyi      | 130-124-523           |
| 144Nd      | CD38          | REA572       | Recomb. human IgG1 | Miltenyi      | 130-122-307           |
| PE         | CD32          | REA997       | Recomb. human IgG1 | Miltenyi      | 130-116-599           |
| 145Nd      | PE            | PE001        | Mouse IgG1         | Fluidigm      | 3145006B              |
| 146Nd      | CD8           | RPA-T8       | Mouse IgG1         | Fluidigm      | 3146001B              |
| 147Sm      | KIR3DL2       | DX31         | Unknown            | Mabtech       | Custom                |
| 148Nd      | CD14          | RMO52        | Mouse IgG2a        | Fluidigm      | 3148010B              |
| 149Sm      | Syk           | 4D10.2       | Mouse IgG2a        | Fluidigm      | 3149020B              |
| 150Nd      | CD34          | AC136        | Mouse IgG2a        | Miltenyi      | 130-108-040           |
| 151Eu      | TIGIT         | MBSA43       | Mouse IgG1 kappa   | Invitrogen    | 16-9500-82            |
| 152Sm      | Siglec-7      | 194211       | Mouse IgG1         | R&D Systems   | MAB11381              |
| 153Eu      | TIM-3         | F38-2E2      | Unknown            | Miltenyi      | Custom                |
| 154Sm      | NKG2C         | REA205       | Recomb. human IgG1 | Miltenyi      | 130-122-278           |
| 155Gd      | KIR2DL1/S1    | 11PB6        | Mouse IgG1 kappa   | Miltenyi      | 130-092-682           |
| 156Gd      | LILRB1        | GHI/75       | IgG2b              | Fluidigm      | 3156020B              |
| 158Gd      | KIR2DL1       | REA284       | Recomb. human IgG1 | Miltenyi      | 130-122-279           |
| 159Tb      | CD2           | RPA-2.10     | Mouse IgG1 kappa   | eBioscience   | 14-0029-82            |
| 161Dy      | Ki-67         | B56          | Mouse IgG1         | Fluidigm      | 3161007B              |
| 162Dy      | CD27          | L128         | Mouse IgG1         | Fluidigm      | 3162009B              |
| 163Dy      | KIR2DL3       | REA147       | Recomb. human IgG1 | Miltenyi      | 130-122-280           |

|       |               |           |                  |                 |             |
|-------|---------------|-----------|------------------|-----------------|-------------|
| 164Dy | CD161         | HP-3G10   | Mouse IgG1       | Fluidigm        | 3164009B    |
| 165Ho | KSP37         | TDA3      | Mouse IgG1 kappa | Biolegend       | 346603      |
| 166Er | NKG2D         | ON72      | IgG1             | Fluidigm        | 3166016B    |
| 167Er | KIR3DL1       | DX9       | IgG1             | Fluidigm        | 3167013B    |
| 168Er | NKp30         | AF29-4D12 | Mouse IgG1 kappa | Miltenyi        | 130-092-554 |
| 169Tm | NKG2A         | Z199      | IgG2b            | Fluidigm        | 3169013B    |
| 170Er | CD3           | UCHT1     | Mouse IgG1       | Fluidigm        | 3170001B    |
| 171Yb | DNAM-1        | DX11      | IgG1             | Fluidigm        | 3171013B    |
| 172Yb | KIR2DL2/S2/L3 | GL183     | Mouse IgG1       | Beckman Coulter | IM1846      |
| 173Yb | Granzyme B    | GB11      | Mouse IgG1       | Fluidigm        | 3173006B    |
| 174Yb | CD94          | HP-3D9    | IgG2a            | Fluidigm        | 3174015B    |
| 175Lu | Perforin      | B-D48     | Mouse IgG1       | Fluidigm        | 3175004B    |
| 176Yb | CD56          | NCAM16.2  | Mouse IgG2b      | Fluidigm        | 3176008B    |
| 209Bi | CD16          | 3G8       | IgG1             | Fluidigm        | 3209002B    |

**Supplemental Table 2. Top 100 significant enriched Gene ontology (GO) pathways in *CISH*<sup>-/-</sup> iPSC-NK cells in comparison WT iPSC-NK cells. Related to Figure 5**

| <b>GOID</b> | <b>Description</b>                                          | <b>padj</b> |
|-------------|-------------------------------------------------------------|-------------|
| GO:0002521  | leukocyte differentiation                                   | 3.62E-06    |
| GO:0009617  | response to bacterium                                       | 2.08E-05    |
| GO:1902105  | regulation of leukocyte differentiation                     | 2.36E-05    |
| GO:0002573  | myeloid leukocyte differentiation                           | 4.05E-05    |
| GO:0002761  | regulation of myeloid leukocyte differentiation             | 0.001906594 |
| GO:0009306  | protein secretion                                           | 0.001906594 |
| GO:0001659  | temperature homeostasis                                     | 0.002952161 |
| GO:0035966  | response to topologically incorrect protein                 | 0.004100741 |
| GO:0070663  | regulation of leukocyte proliferation                       | 0.004100741 |
| GO:0002790  | peptide secretion                                           | 0.004100741 |
| GO:1902107  | positive regulation of leukocyte differentiation            | 0.005910755 |
| GO:0006986  | response to unfolded protein                                | 0.006383619 |
| GO:0030098  | lymphocyte differentiation                                  | 0.006383619 |
| GO:0032944  | regulation of mononuclear cell proliferation                | 0.006383619 |
| GO:0030217  | T cell differentiation                                      | 0.006383619 |
| GO:0001819  | positive regulation of cytokine production                  | 0.006383619 |
| GO:0002683  | negative regulation of immune system process                | 0.006383619 |
| GO:0002237  | response to molecule of bacterial origin                    | 0.006383619 |
| GO:0050663  | cytokine secretion                                          | 0.006430113 |
| GO:0030968  | endoplasmic reticulum unfolded protein response             | 0.006430113 |
| GO:0035967  | cellular response to topologically incorrect protein        | 0.006430113 |
| GO:0051047  | positive regulation of secretion                            | 0.006430113 |
| GO:0050714  | positive regulation of protein secretion                    | 0.006430113 |
| GO:1904894  | positive regulation of STAT cascade                         | 0.006430113 |
| GO:0050670  | regulation of lymphocyte proliferation                      | 0.006430113 |
| GO:0032496  | response to lipopolysaccharide                              | 0.006430113 |
| GO:1904892  | regulation of STAT cascade                                  | 0.006430113 |
| GO:0006614  | SRP-dependent cotranslational protein targeting to membrane | 0.006430113 |
| GO:0051249  | regulation of lymphocyte activation                         | 0.007305719 |
| GO:0050708  | regulation of protein secretion                             | 0.007305719 |
| GO:0034620  | cellular response to unfolded protein                       | 0.007305719 |
| GO:1903707  | negative regulation of hemopoiesis                          | 0.007305719 |
| GO:0030517  | negative regulation of axon extension                       | 0.007564823 |
| GO:1903708  | positive regulation of hemopoiesis                          | 0.008916126 |
| GO:0031649  | heat generation                                             | 0.008916126 |
| GO:0050777  | negative regulation of immune response                      | 0.00990916  |
| GO:0070661  | leukocyte proliferation                                     | 0.00990916  |



|            |                                                                |             |
|------------|----------------------------------------------------------------|-------------|
| GO:1903532 | positive regulation of secretion by cell                       | 0.010217165 |
| GO:0002694 | regulation of leukocyte activation                             | 0.010217165 |
| GO:0048871 | multicellular organismal homeostasis                           | 0.010217165 |
| GO:0070972 | protein localization to endoplasmic reticulum                  | 0.010217165 |
| GO:0032963 | collagen metabolic process                                     | 0.010217165 |
| GO:0007162 | negative regulation of cell adhesion                           | 0.010217165 |
| GO:0051250 | negative regulation of lymphocyte activation                   | 0.010217165 |
| GO:0002793 | positive regulation of peptide secretion                       | 0.010217165 |
| GO:0046427 | positive regulation of JAK-STAT cascade                        | 0.010217165 |
| GO:0006613 | cotranslational protein targeting to membrane                  | 0.010217165 |
| GO:0046425 | regulation of JAK-STAT cascade                                 | 0.010217165 |
| GO:0098542 | defense response to other organism                             | 0.010217165 |
| GO:0031650 | regulation of heat generation                                  | 0.010217165 |
| GO:0050715 | positive regulation of cytokine secretion                      | 0.010217165 |
| GO:0030099 | myeloid cell differentiation                                   | 0.010266201 |
| GO:0050865 | regulation of cell activation                                  | 0.01120007  |
| GO:0097696 | STAT cascade                                                   | 0.01120007  |
| GO:0042330 | taxis                                                          | 0.01120007  |
| GO:1902106 | negative regulation of leukocyte differentiation               | 0.012054418 |
| GO:0048305 | immunoglobulin secretion                                       | 0.012054418 |
| GO:0050707 | regulation of cytokine secretion                               | 0.012054418 |
| GO:0002292 | T cell differentiation involved in immune response             | 0.012054418 |
| GO:0045047 | protein targeting to ER                                        | 0.012405075 |
| GO:0048008 | platelet-derived growth factor receptor signaling pathway      | 0.012405075 |
| GO:0006935 | chemotaxis                                                     | 0.012405075 |
| GO:0042110 | T cell activation                                              | 0.012734567 |
| GO:0072599 | establishment of protein localization to endoplasmic reticulum | 0.012734567 |
| GO:0019731 | antibacterial humoral response                                 | 0.013006017 |
| GO:0030888 | regulation of B cell proliferation                             | 0.013410282 |
| GO:0002695 | negative regulation of leukocyte activation                    | 0.013462366 |
| GO:0007160 | cell-matrix adhesion                                           | 0.013559666 |
| GO:0048841 | regulation of axon extension involved in axon guidance         | 0.013688204 |
| GO:0045580 | regulation of T cell differentiation                           | 0.013859414 |
| GO:0050856 | regulation of T cell receptor signaling pathway                | 0.013859414 |
| GO:0042113 | B cell activation                                              | 0.013878471 |
| GO:0030574 | collagen catabolic process                                     | 0.013995604 |
| GO:0007159 | leukocyte cell-cell adhesion                                   | 0.014073056 |
| GO:0051222 | positive regulation of protein transport                       | 0.014073056 |
| GO:0002791 | regulation of peptide secretion                                | 0.014476373 |
| GO:0050868 | negative regulation of T cell activation                       | 0.015199065 |
| GO:0009435 | NAD biosynthetic process                                       | 0.015199065 |

|            |                                                                             |             |
|------------|-----------------------------------------------------------------------------|-------------|
| GO:0022407 | regulation of cell-cell adhesion                                            | 0.016106186 |
| GO:0051043 | regulation of membrane protein ectodomain proteolysis                       | 0.016661935 |
| GO:0048514 | blood vessel morphogenesis                                                  | 0.017820436 |
| GO:0002675 | positive regulation of acute inflammatory response                          | 0.017820436 |
| GO:0010631 | epithelial cell migration                                                   | 0.017820436 |
| GO:0007259 | JAK-STAT cascade                                                            | 0.017820436 |
| GO:1904951 | positive regulation of establishment of protein localization                | 0.017820436 |
| GO:0036005 | response to macrophage colony-stimulating factor                            | 0.017820436 |
| GO:0036006 | cellular response to macrophage colony-stimulating factor stimulus          | 0.017820436 |
| GO:0061844 | antimicrobial humoral immune response mediated by antimicrobial peptide     | 0.018313008 |
| GO:0001667 | ameboidal-type cell migration                                               | 0.018313008 |
| GO:0045655 | regulation of monocyte differentiation                                      | 0.018313008 |
| GO:0051023 | regulation of immunoglobulin secretion                                      | 0.018313008 |
| GO:0050863 | regulation of T cell activation                                             | 0.019709414 |
| GO:0002294 | CD4-positive, alpha-beta T cell differentiation involved in immune response | 0.020146934 |
| GO:0030316 | osteoclast differentiation                                                  | 0.020227355 |
| GO:1903706 | regulation of hemopoiesis                                                   | 0.020227355 |
| GO:0050867 | positive regulation of cell activation                                      | 0.020456786 |
| GO:0090132 | epithelium migration                                                        | 0.020573919 |
| GO:0045926 | negative regulation of growth                                               | 0.021159138 |
| GO:0031532 | actin cytoskeleton reorganization                                           | 0.021221061 |
| GO:0045619 | regulation of lymphocyte differentiation                                    | 0.021221061 |
